# Supplementary material for: Theoretical screening of efficient single-atom catalysts for nitrogen fixation based on a defective BN monolayer
Source: Royal Society of Chemistry journal article supplement (doi:10.1039/c9nr08969a), 2019-12-11
Supplement: c9nr08969a1.pdf [file c9nr08969a1.pdf]

## **Supporting Information for “Theoretical screening of efficient single-atom catalysts for nitrogen fixation based on defective BN monolayer”**

Zuju Ma,<sup>1,2, a)</sup> Zhitao Cui,<sup>1</sup> Chengwei Xiao,<sup>1</sup> Wen Dai,<sup>1</sup> Yaohui Lv,<sup>1</sup> Qiaohong Li<sup>3</sup> and Rongjian Sa,<sup>4, a)</sup>

<sup>1</sup>Key Laboratory of Green Fabrication and Surface Technology of Advanced Metal Materials (Ministry of Education), Anhui University of Technology, Ma'anshan, 243002, China

<sup>2</sup>State Key Laboratory of Photocatalysis on Energy and Environment, Fuzhou University, Fuzhou, 350116, China.

<sup>3</sup>State Key Laboratory of Structural Chemistry, Fujian Institute of Research on the Structure of Matter, Chinese Academy of Sciences, Fuzhou 350002, China

<sup>4</sup>Institute of Oceanography, Ocean College, Minjiang University, Fuzhou, 350108, China

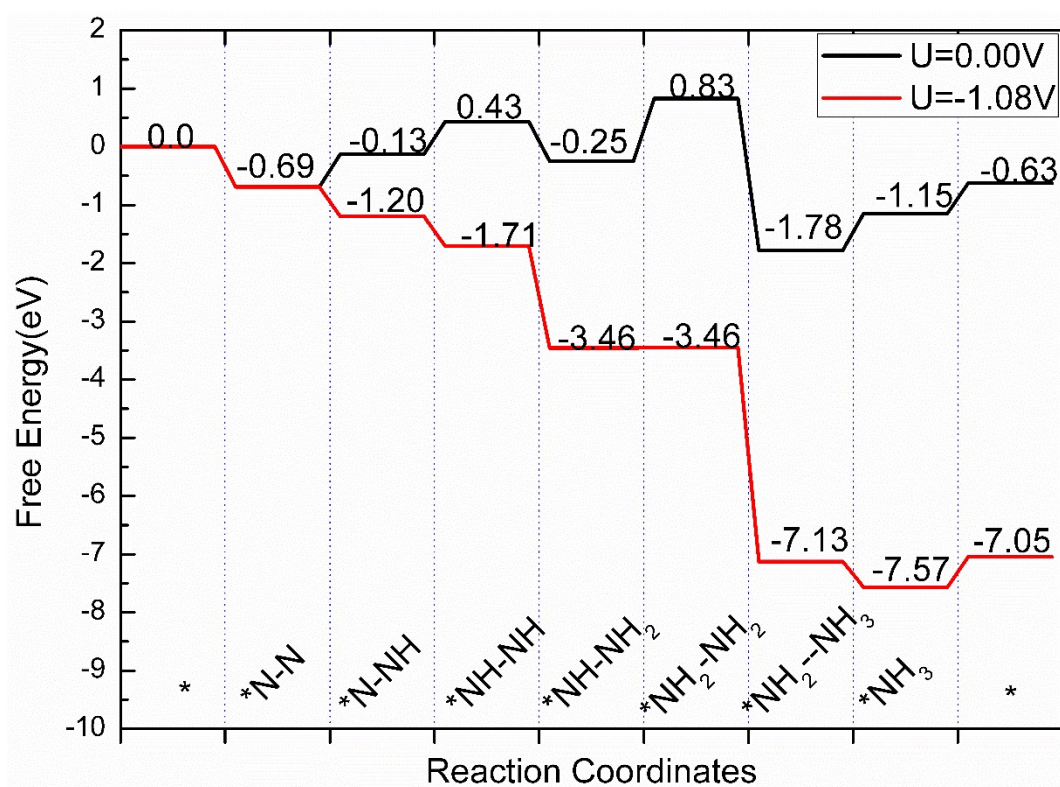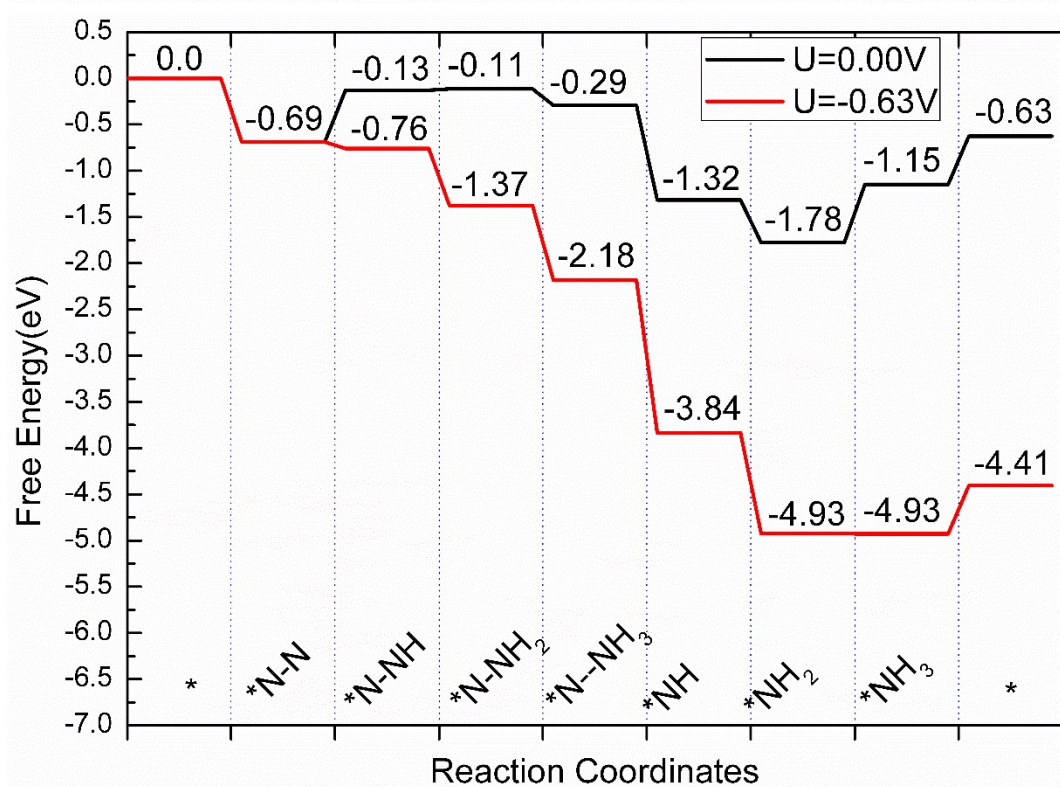

Fig. S1 The calculated free energy diagrams of NRR on the plane of Tc@BN through alternating (a) and distal (b) pathway.

(a)

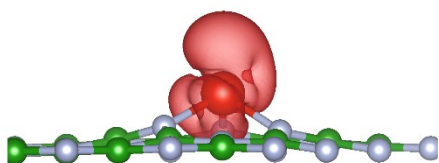

(b)

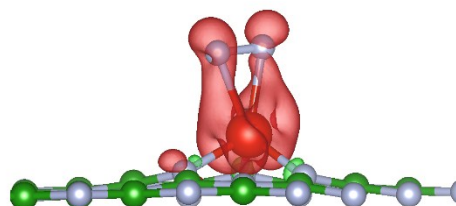

Fig. S2. The Spin density of V@BN before (a) and after (b) N<sub>2</sub> adsorption.

Table S1. The Bader charge of V atom, three-coordinated N atoms (N1, N2, and N3) in h-BN and N<sub>2</sub> molecular in V@BN and N<sub>2</sub> adsorbed V@BN, respectively.

|                      | V     | N1   | N2   | N3   | N <sub>2</sub> |
|----------------------|-------|------|------|------|----------------|
| V@BN                 | -1.41 | 1.88 | 1.89 | 1.88 |                |
| N <sub>2</sub> *V@BN | -1.75 | 1.85 | 1.88 | 1.85 | 0.51           |
